# Supplementary material for: Ruthenium mononitro and mononitroso terpyridine complexes incorporating azoimine based ancillary ligands. Synthesis, crystal structure, spectroelectrochemical properties and kinetic aspects †
Source: Royal Society of Chemistry journal article supplement (doi:10.1039/b007975h), 2001-01-01
Supplement: b007975h.doc [file b007975h.doc]

**Supplementary Table**

**Table 1** Microanalyticala, IRb and conductivityc data

| Compound | Microanalytical data | | | IR/cm-1 | M/-1  cm2mol-1 |
| --- | --- | --- | --- | --- | --- |
| % C | % H | % N | NO2- NO N=N  ClO4- |
| **6** | 46.96  (47.07) | 3.38  (3.01) | 14.96  (14.78) | 1361 - 1300 1084  628 | 146 |
| **7** | 47.33  (47.87) | 3.36  (3.25) | 14.34  (14.48) | 1355 - 1305 1087  620 | 151 |
| **8** | 44.66  (44.74) | 2.94  (2.72) | 14.42  (14.05) | 1361 - 1307 1084  628 | 150 |
| **9** | 48.09  (47.87) | 3.08  (3.25) | 14.68  (14.48) | 1355 - 1303 1092  623 | 145 |
| **10** | 45.02  (44.74) | 2.63  (2.72) | 13.94  (14.05) | 1360 - 1310 1099  625 | 153 |
| **11** | 36.57  (36.90) | 2.25  (2.36) | 11.39  (11.59) | - 1960 1310 1097  620 | 330 |
| **12** | 37.82  (37.69) | 2.67  (2.56) | 11.16  (11.40) | - 1953 1309 1086  628 | 335 |
| **13** | 35.09  (35.45) | 2.02  (2.16) | 10.92  (11.13) | - 1952 1312 1090  629 | 335 |
| **14** | 37.38  (37.69) | 2.80  (2.56) | 11.09  (11.40) | - 1955 1319 1086   623 | 333 |
| **15** | 35.73  (35.45) | 2.24  (2.16) | 11.42  (11.13) | - 1957 1315 1092  625 | 340 |

aCalculated values are in parentheses.

bAs KBr discs.

cIn acetonitrile solvent at 298K

**Table 2** Rate constants and activation parameters of [Ru(trpy)(L)(H2O)]2+(**1** – **5**)

 [Ru(trpy)(L)(NO2)]+ (**6** – **10**)in presence excess NaNO2 in water .

| Compound | 103 k/s-1,299K | 102 k/s-1,309K | 102 k/s-1,319K | H/  kJ mol-1 | S/  JK-1 mol-1 |
| --- | --- | --- | --- | --- | --- |
| **1** | 5.52 | 1.47 | 3.87 | 86.59 | -1.09 |
| 2 | 3.92 | 1.10 | 2.94 | 86.52 | -2.18 |
| 3 | 8.47 | 2.54 | 7.40 | 84.48 | -2.30 |
| 4 | 8.02 | 2.67 | 7.19 | 84.49 | -2.24 |
| 5 | 9.15 | 3.97 | 12.16 | 85.08 | -2.22 |
